# Supplementary material
Source: publisher site journal article supplement (https://www.dovepress.com/article/237228)
Supplement: Supplementary file 1 [file get_supplementary_file.php]

**Supplementary Table 1** Summary of included studies

| **Study** | **Participants, n**  **Age, years** | **Parameters analyzed** | **Key findings** |
| --- | --- | --- | --- |
| **Inflammation and obesity** | | | |
| Balgoma D, et al29  Karolinska COSMIC cross-sectional study | 114 (healthy never-smokers, 39; smokers, 40; COPD, 25; COPD ex-smokers, 10)  54‒62 years (mean) | BALF samples were collected from the Karolinska COSMIC cohort. Lipid mediators derived from the cytochrome P450, lipoxygenase, and cyclooxygenase pathways were analyzed by LC-MS/MS. | -Multivariate modeling identified a 9‑lipid panel in BALF that differentiated female smokers with COPD from healthy female smokers (*P*=6×10−6).  -The lipid mediators correlated with FEV1 and FEV1/FVC (r=0.87; *P*=0.0009) and mRNA levels of enzymes putatively involved in their biosynthesis (r=0.96; *P*=0.003) in women. Leukotoxin levels correlated with goblet cell abundance (r=0.72; *P*=0.028).  -Cytochrome P450-derived epoxide products of linoleic acid (leukotoxins) and their corresponding soluble epoxide hydrolase‒derived products (leukotoxin diols) play a putative role in the clinical manifestations of COPD in a female-dominated disease subphenotype. |
| Breyer MK, et al30  Cross-sectional study | 126 (COPD, 91; healthy controls, 35)  55‒70 years (median interquartile) | Plasma concentrations of adipokines (leptin, adiponectin, and resistin) and systemic inflammatory biomarkers (CRP, IL-6, and TNF-α and its soluble receptors 55 and 75 [sTNFα-R55 and sTNFα-R75]) were analyzed. | -The COPD group was characterized by increased levels of CRP, IL-6, and leptin.  -Men with COPD had lower circulating levels of adiponectin and leptin and lower leptin/fat mass compared to women with COPD.  -Leptin secretion was increased in women with COPD vs healthy women and men with COPD, and to a greater extent in overweight women with COPD. |
| Diaz AA, et al38  ECLIPSE longitudinal study | 73 patients with COPD  59‒67 years (median interquartile) | CT scans at 1- and 3-year follow-up were used to assess PMA and SAT. | -Women had a smaller PMA and a greater SAT area than men (difference range for PMA, 13.3–22.8 cm²; for SAT, 11.8–12.4 cm²; *P*<0.05 for all comparisons) at both anatomical levels.  -CRP (for aortic arch level, *P*=0.04) and fibrinogen (for both anatomical locations, *P*=0.003) was directly associated with SAT in women only. |
| de Torres JP, et al39  BODE cross-sectional study | 232 (COPD, 152; smokers without COPD, 80)  62‒64 years (range of mean values) | Plasma levels of IL-6, IL-8, IL-16, MCP-1, MMP-9, PARC, and VEGF were measured. Patient characteristics, smoking history, lung function, exercise tolerance, body composition, BODE index, comorbidities, and quality of life were determined. Associations between plasma biomarker levels and clinical characteristics of the patients were assessed. | -Plasma biomarker levels in smokers without COPD were similar between men and women with similar characteristics.  -In patients with COPD, there was a statistically significant difference in median levels between women and men in IL-6 (6.26 vs 8.08 pg/mL; *P*=0.03), IL-16 (390 vs 321 pg/mL; *P*=0.01), and VEGF (50.3 vs 87.7 pg/mL; *P*=0.02).  -The strength of the association between select biomarkers and clinical variables known to be associated with poor outcomes were different in men and women. |
| Larsson S, et al40  Cross-sectional study | 192 (COPD, 41; healthy controls, 151)  63‒72 years (mean) | Blood was collected in the morning after fasting for 12 hours, and leukocyte and differential counts, CRP, TNF-α, IL-6, IL-8, myeloperoxidase, neutrophil elastase, intracellular adhesion molecule-1, vascular endothelial adhesion molecule-1, and E-selectin levels were measured. | -The mean neutrophil concentration was significantly higher (*P*=0.019) in women (4.5×109/L) than in men (3.5×109/L) with COPD and female control subjects (3.1×109/L; *P*<0.01).  -Higher levels of CRP (*P*=0.20), IL-6, and IL-8 (*P*>0.05) were found in women vs men with COPD. |
| Sharanya A, et al41  Cross-sectional study | 144 (COPD, 114; healthy matched controls, 30)  65‒67 years (mean) | Body composition, quadriceps function (MVC and T80) and fiber characteristics, whole body exercise performance and daily physical activity (6 MW, peak oxygen consumption), and selected markers of systemic and muscle inflammation (granulocyte monocyte colony stimulating factor, TNF-α, IFNγ, IL -1β, -2, -4, -5, -6, -8, -10, and CRP) were analyzed. | -Women COPD patients had lower quadriceps muscle strength and peak workload on a maximal incremental cycle ergometry protocol compared to men.  -Women had a smaller type II fiber cross-sectional area compared to men (largely driven by a few men with a large type II fiber cross-sectional area).  -Women had significantly higher concentrations of a number of plasma pro-inflammatory cytokines including TNFα and IL8, but not lower levels of physical activity or arterial oxygenation, compared to men. |
| Bridevaux PO, et al42  SAPALDIA cohort study | 5479 (non-fast FEV1 decliners [men], 2016; fast FEV1 decliners [men], 600; non-fast FEV1 decliners [women], 2121; fast FEV1 decliners [women], 742)  50‒57 years (mean) | Serum hs-CRP was analyzed using frozen serum. | -High hs-CRP was associated with fast FEV1 decline and weight gain.  -Association of weight gain and hs-CRP was more pronounced in women than in men (2.0 mg·L-1 vs 1.6 mg·L-1).  -Effect of weight gain on systemic inflammation was greater in women, and hence, could act as a risk factor for extrapulmonary comorbidities. |
| Ólafsdóttir IS, et al43  ECRHS epidemiological survey | 1237 (COPD, 53; at risk of COPD, 87; others, 1097)  28‒56 years (mean) | Blood was collected and serum was used for the analysis of CRP at the end of the follow-up period (mean 8.3 years). | -High CRP levels (>0.46 mg/L) were associated with significantly lower FEV1 values in both men and women.  -Decline in FEV1 was greater in men with high CRP than in women (*P*=0.04). |
| Zhang X, et al35  Cross-sectional study | 89 (COPD, 50; healthy controls, 39)  61‒66 years (mean) | Blood was collected in the morning after fasting and plasma levels of FABP4, adiponectin, TNF‑α*,* and CRP were measured. | -FABP4 levels in women with COPD were increased in comparison with that in men with COPD (mean±SD; 6.66±2.85 ng/mL vs 4.35±2.16 ng/mL; *P*<0.0001).  -FABP4 was inversely related to FEV1% predicted (r=−0.599; *P*=0.005) and positively correlated with CRP (r=0.511; *P*=0.021) in women. |
| **Dysregulated immune cell function and autophagy** | | | |
| Faner R, et al55  Prospective, controlled study | 30 (COPD, 9; non-smokers, 10; smokers, 11)  51‒68 years (mean) | Blood samples were collected and blood cells were used for RNA extraction (for smokers, blood samples were obtained before, and 30 min and 180 min after smoking). IL-6 and IL-8 were analyzed by high-sensitivity ELISA, and leukocyte transcriptomic response was analyzed using affymetrix microarrays. | -Transcriptomic response to smoke in circulating leukocytes was different in men and women. |
| Maury J, et al52  Cross-sectional study | 54 patients with COPD  40‒80 years (mean) | Venous blood samples were collected in the morning after fasting. Oxidative stress and lipid peroxidation were analyzed. | -Systemic lipid peroxidation levels were significantly higher in women vs men with COPD (mean±SD; 701±263 μmol/L vs 468±190 μmol/L; *P*<0.01).  -The negative correlation between systemic lipid peroxidation and the 6-minute walking distance (as % predicted) was significant only in women (r=−0.49; *P*<0.05). |
| Naz S, et al50  Karolinska COSMIC cross-sectional study | 116 (COPD smokers, 27; COPD ex-smokers, 11; healthy never-smokers, 38; smokers, 40)  53‒64.0 years (median) | Blood samples were collected from the Karolinska COSMIC cohort, and BALF was analyzed for miR-29a-3p, miR-29b-3p, and miR-29c-3p targeting autotaxin (ENPP2) and miR-218-5p targeting NAPE-PLD. | -Metabolic dysregulation was enhanced in women (*P*=3.0×10−3) vs men (*P*=0.10) with COPD.  -lysoPA correlated with lung function (FEV1) in men (r=0.86; *P*<0.0001) but not in women (r=0.44; *P*=0.15).  -Members of the miR-29 family were significantly upregulated in men with COPD vs smokers in BALF cells (*P*=0.004–0.056) and BECs (*P*=0.03–0.06), and no alteration was observed in women with COPD (BALF, *P*=0.78–0.90; BEC, *P*=0.22–0.29). |
| Kohler M, et al51  Karolinska COSMIC cross-sectional study | 77 (COPD smokers, 15; COPD ex-smokers, 6; healthy non-smokers, 23; healthy smokers, 33)  54‒61 years (mean) | Blood samples were collected from the Karolinska COSMIC cohort and BALF was analyzed for protein levels. | -Subset of 19 proteins differentiated between healthy women smokers with and without COPD, with a 78% predictive power. No such alterations were observed in men.  -Pathway analysis showed downregulation of the lysosomal pathway and upregulation of oxidative phosphorylation, indicating dysregulation of macroautophagy in women with COPD. |
| Yang M, et al49  Karolinska COSMIC cross-sectional study | 69 (COPD smokers, 18; COPD ex-smokers, 8; healthy never-smokers, 18; healthy smokers, 25)  55‒58 years (mean) | BALF samples collected from the Karolinska COSMIC cohort were analyzed for protein levels. | -Pronounced alterations in protein and pathway analysis were observed in women (*P*=1.9×10−7) with COPD, and not significantly in men (*P*=9.4×10−6).  -FcγR-mediated phagocytosis correlated with FEV1/FVC, the lysosomal pathway correlated with emphysema, and regulation of actin cytoskeleton correlated with FEV1 and FEV1/FVC.  -Alterations in the pathways indicated dysregulation of several phagocytosis-related pathways in women with COPD. |
| Forsslund H, et al44  Karolinska COSMIC cross-sectional study | 118 (COPD smokers, 27; COPD ex-smokers, 11; never-smokers, 40; smokers, 40)  53‒63 years (median) | Blood and BALF samples were collected and analyzed for T cell chemokine expression, soluble cytokines, and chemokines. | -Higher expression of CCR5 on CD8+ T cells in blood (*P*<0.01) and BALF (*P*<0.05) and higher percentage of CXCR3+ CD8+ T cells (*P*<0.05) were observed in women smokers with COPD than in those without COPD, whereas CCR5 expression on CD4+ (*P*<0.01) and CD8+ (*P*<0.05) T cells was lower in BALF in smokers (men) with COPD compared to those without COPD.  -Among women smokers with COPD, Th1/Tc1 immune response was linked to BAL macrophage numbers (r=0.79;  *P*=0.006) and goblet cell density (r=0.80; *P*=0.02), and Th2/Tc2 response was associated with the measures of emphysema (r=0.80; *P*=0.002).  -Difference in the T-cell profile indicated activation of different cellular events and clinical manifestations between men and women. |
| Naz S, et al53  Karolinska COSMIC cross-sectional study | 116 (healthy never-smokers, 39; smokers, 40; COPD smokers, 27; COPD ex-smokers, 10)  52.5‒63.5 years (median) | Peripheral blood samples were collected from the Karolinska COSMIC cohort. Tryptophan, serotonin, kynurenine, and kynurenic acid were quantified by LC-MS/MS. Individual metabolite associations with lung function, blood, and BAL immune-cell composition, as well as chemokine and cytokine levels, were investigated. | -Alterations in kynurenine (*P*=0.005) and kynurenic acid(*P*=0.009), and to a lesser extent serotonin(*P*=0.02), were prominent in males, irrespective of COPD status.  -Serum IDO activity correlated with blood CXCL9 (*P*=0.0009, r=0.93) and CCL4 (*P*=0.04, r=0.73) in female COPD smokers.  -Serum serotonin levels correlated with BAL CD4+ T-cells (%) *P*=0.001, r=0.92) and CD8+ T-cells (%) (*P*=0.002, r=−0.90) in female COPD smokers, but not in male COPD smokers (*P*=0.1, r=0.46 and *P*=0.1, r=−0.50, respectively). |
| Glass K, et al54  ECLIPSE longitudinal study | 132 patients with COPD  63‒66 years (mean) | Blood and sputum samples were collected from patients enrolled in the ECLIPSE study. A “Passing Attributes between Networks for Data Assimilation” analysis was performed. | -Gene set enrichment  Analysis showed strong patterns of differential targeting, with many functions that have significantly (FDR < 0.01) greater targeting in women vs men.  -Network analysis demonstrated mechanisms causing sexual dimorphism in COPD, especially related to mitochondrial function and energy metabolism. |
| **Structural and physiological differences** | | | |
| Hardin M, et al59  Case-control studies (COPDGene non-Hispanic white and  African American, ECLIPSE, GenKOLS) | 11,529 (COPD, 6260; healthy smokers, 5269)  53‒66 years (mean) | Blood samples were collected, and genotyping using Illumina genome-wide SNP platforms was performed. | -In the sex-stratified meta-analysis, SNP rs9615358 in the cadherin gene (*CELSR1*) involved in fetal lung development was associated with COPD among women (OR, 1.37 [95% CI, 1.25–1.49]; *P*=3.32×10−7) but not in men (OR, 0.90 [95% CI, 0.79–1.01]; *P*=0.06). The gene expression was also higher in women than in men.  -*CELSR1* could be a potential sex-specific risk factor for COPD. |
| Camiciottoli G, et al56  Cross-sectional study | 69 patients with COPD  66‒67 years (mean) | CT was performed to analyze predominant conductive airway or emphysema phenotypes and densitometric data was also analyzed according to sex. | -Intrathoracic tracheal collapsibility was greater in women.  -Women with a predominant conductive airway phenotype (n=10) showed a significantly  greater degree of collapsibility than women with predominant emphysema (28.9%±4% vs 11.6%±2%; *P*<0.001). |
| Martinez FJ, et al61  National Emphysema Treatment prospective randomized trial | 1053 patients with COPD  65‒67 years (mean) | CT was performed to analyze airway size and thickness. | -Women had smaller airway lumens, with thicker airway walls and less severe emphysema characterized by smaller hole size and less peripheral movement than men. |
| Camp PG, et al63  Cross-sectional study | 688 individuals with smoking history (probands with early-onset severe COPD, 273; siblings regardless of lung function, 415)  56.9‒59.3 years (mean) | HRCT scans were obtained to assess emphysema (LAA% cutoff −950 Hounsfield units) and airway wall thickness from participants in the International COPD Genetics Network study. | -Men had a greater LAA% and larger emphysematous spaces than women (24%±12% vs 20%±11%, respectively; *P*<0.0001).  -The gender differences persisted after adjusting for covariates (weight, pack-years of smoking, current smoking status, center of enrollment, and FEV1 percent predicted; *P*=0.0006).  -Women had a smaller square root of the airway wall area and airway wall% after adjusting for covariates (*P*<0.0001). |
| Guenette JA, et al57  Cross-sectional study | 64 (COPD, 32; healthy controls, 32)  62‒69 years (mean) | PFT and cardiopulmonary exercise testing were performed to measure several parameters, including work rate or VE and FEV1. | -Women with COPD had significantly greater dyspnea than men (*P*<0.05).  - VE was significantly higher in women than men (*P*<0.05).  -Women reached tidal volume constraints at a lower work rate and VE. |
| Li Y, et al67  Retrospective study | 359 patients with COPD  59‒60 years (mean) | FACT-Digital lung TM software (DeXin, Xi’an, China) was used to retrospectively analyze lumen diameter, wall thickness, lumen area, and cross-sectional wall area. | -Women had a significantly larger cross-sectional wall area and smaller lumen diameter, lumen area, and wall thickness than men (*P*<0.05). |
| Gu S, et al64  Cross-sectional study | 84 patients with COPD  64‒71 years (mean) | HRCT in addition to PFT was analyzed. Emphysema was  scored visually as LAA (< −910 Hounsfield unites) in the upper, middle, and lower lung fields. | -Women showed a higher FEV1/FVC (64% vs 56%), lower FVC (1.91 vs 2.75 L), and lower inspiratory capacity (1.4 vs 2.0 L) than men.  -Men were more likely to show evidence of emphysema than women. |
| Dransfield MT, et al62  National Lung Screening longitudinal study | 396 current and former smokers with COPD  61.2‒62.9 years (mean) | CT scans from patients enrolled in the National Lung Screening Trial were analyzed to determine regional and total emphysema (LAA% <−950 Hounsfield units). | -Men had more regional and total emphysema at all stages of COPD than women (stage 0, 3.9% vs 2.4%,  *P*=0.001; stage I, 7.0% vs 3.7%, *P*=0.015; stage II, 7.8% vs 5.5%,  *P*=0.063; stages III/IV, 15.8% vs 8.7%,  *P*=0.024).  -Gender (*P*<0.001) and FEV1/FVC ratio (*P*<0.001) predicted total LAA% in multivariate regression analysis. |
| Hardin M, et al65  Cross-sectional study | 3690 current and former smokers with COPD  58.8‒65.1 years (mean) | CT scans from patients enrolled in the COPDGene study were analyzed to measure emphysema (LAA% <−950 Hounsfield units). | -Compared to women, men had higher log %LAA: overall (1.97±1.4 vs 1.69±1.6, ß=0.32(0.04), *P*=1.34×10-14), among non-Hispanic whites (*P*=8.37×10-14), and African American subjects (*P*=0.002).  -Women with early-onset COPD, severe emphysema, and GOLD grade IV COPD, had similar emphysema as men but markedly fewer pack-years smoking (early-onset *P*=0.01, severe emphysema and GOLD grade IV *P*<0.001). |
| Sverzellati N, et al66  Multicentric Italian Lung Detection randomized study | 957 smokers  57.6‒58.5 years (mean) | Multidetector CT scans from smokers were assessed for emphysema (<−950 Hounsfield units). | -Lung volume, mean lung density, and 15th percentile point measurements were less severe in women than in men smokers (*P*<0.0001).  -Women had a lower proportion of emphysema in the core of the lung compared with the peel; this was reverse in men (*P*<0.0001).  -The proportion of emphysema was lower in each lobe in women (*P*<0.0001).  -A significantly greater proportion of the bigger emphysematous clusters were observed in men. |
| Carter R, et al69  Cross-sectional study | 417 (COPD, 388; healthy controls, 29)  60‒66 years (mean) | Exercise testing based on pulmonary dysfunction was performed. | -Men demonstrated reduction in body weight, oxygen pulse, and maximum exercise ventilation, whereas women did not lose weight and maintained the same oxygen pulse and exercise ability.  -Men had a decrease in cardiac function, while women did not (*P*<0.0001).  -Women developed COPD with lower exposure to smoke than men. |
| Tang R, et al70  Population based cohort study | 271,271 women with COPD  56.4 years (mean) | The following self-reported female reproductive health indicators were investigated: age at menarche (<12, 12 to 15 and >15 years), menopause status (no, yes), age at natural menopause (<47, 47 to 49, 50 to 52 and >52 years), parity (0, 1, 2, 3 and >3), history of PCOS or ovarian cysts, history of endometriosis, OC use (never/ever), years of OC use (0, 1, 2 to 4, 5 to 9, 10 to 15 and >15), HRT use (never/ever), years of HRT use (0, 1 to 2, 3 to 5, 6 to 10 and >10) and gynecological surgery (hysterectomy, oophorectomy and hysterectomy with bilateral oophorectomy). | The following indicators were associated with greater risk of COPD-related hospitalization/death:  -Late (age >15 years) menarche vs menarche between age 12 to 15 (HR, 1.37; 95% CI: 1.11, 1.71).  -Women who experienced menopause <47 years (HR 1.44; 95% CI: 1.19, 1.75) vs 50 to 52 years.  -Parity >3 (HR 1.45; 95% CI: 1.16, 1.82) vs nulliparity.  -A history of PCOS or ovarian cysts (HR 1.61; 95% CI: 1.12 to 2.32).  -Using HRT (HR 1.15; 95% CI: 1.01, 1.30).  -A history of hysterectomy (HR 1.49 95% CI: 1.28, 1.74).  Women who had used OC had lower risk of hospitalization/death from COPD vs never users (HR 0.85; 95% CI: 0.74, 0.97). |

**Abbreviations:** BALF, bronchoalveolar lavage fluid; BEC, bronchial epithelial cell; BODE, body-mass; CCL, chemokine (C-C motif) ligand; CCR, CC chemokine receptor; CD, cluster of differentiation; *CELSR1*, cadherin EGF LAG seven-pass G-type receptor 1; CI, confidence interval; COPD, chronic obstructive pulmonary disease; COSMIC, Clinical & Systems Medicine Investigations of Smoking-related Chronic Obstructive Pulmonary Disease; CRP, C-reactive protein; CT, computed tomography; CXCL, CXC chemokine ligand; CXCR3, C-X-C motif chemokine receptor 3; ECLIPSE, Evaluation of COPD Longitudinally to Identify Predictive Surrogate End-points; ECRHS, European community respiratory health survey; ELISA, enzyme-linked immunosorbent assay; ENPP2, ectonucleotide pyrophosphatase/phosphodiesterase 2; FABP4, fatty acid–binding protein 4; FcγR, Fc-gamma receptor; FDR, false discovery rate; FEV1, forced expiratory volume in 1 second; FVC, forced vital capacity; GenKOLS, Genetics of Chronic Obstructive Lung Disease; HR, hazard ratio; HRCT, high-resolution computed tomography; HRT, hormone replacement therapy; hs-CRP, high-sensitivity C-reactive protein; IDO, indoleamine 2,3-dioxygenas; IFN, interferon; IL, interleukin; LAA, low-attenuation area; LC-MS/MS, liquid chromatography with tandem mass spectrometry; lysoPA, lysophosphatidic acid; MCP-1, monocyte chemoattractant protein-1; miR, micro-ribonucleic acid; MMP-9, matrix metalloproteinase-9; MVC, maximal voluntary contraction; NAPE-PLD, N-acyl phosphatidylethanolamine phospholipase D; OC, oral contraception; OR, odds ratio; mRNA, messenger ribonucleic acid; NAPE-PLD, N-acyl phosphatidylethanolamine-specific phospholipase D; PARC, pulmonary activation-regulated chemokine; PCOS, polycystic ovary syndrome; PFT, pulmonary function test; PMA, pectoralis muscle area; RNA, ribonucleic acid; SAPALDIA, Swiss study on Air Pollution and Lung Diseases in Adults; SAT, subcutaneous adipose tissue; SNP, single-nucleotide polymorphism; Tc, cytotoxic T cell; Th, T-helper cell; TNF, tumor necrosis factor; VEGF, vascular endothelial growth factor; VE, work rate or ventilation.
